## Host body size, not host population size, predicts genome-wide effective population size of parasites

Jorge Doña<sup>1,2\*</sup> and Kevin P. Johnson<sup>2\*</sup>

<sup>1</sup> Departamento de Biología Animal, Universidad de Granada, Granada, Spain

<sup>2</sup> Illinois Natural History Survey, Prairie Research Institute, University of Illinois, Champaign, Illinois, USA 61820

\* Jorge Doña and Kevin Johnson.

**Email:** Jorge Doña: [jorged@ugr.es](mailto:jorged@ugr.es); Kevin P. Johnson: [kpjohnso@illinois.edu](mailto:kpjohnso@illinois.edu)

**Article type:** Letter

**Short running title:** Host body size predicts parasite  $N_e$

**Abstract word count:** 126

**Total word count:** 4819

**Competing Interest Statement:** None.

**Keywords:** *coevolution, heterozygosity, infrapopulation, lice, Phthiraptera*

1 **Abstract**

2 The effective population size ( $N_e$ ) of an organism is expected to be proportional to the total  
3 number of individuals in a population. In parasites, we might expect the effective population size  
4 to be proportional to host population size and host body size, because both are expected to  
5 increase the number of parasite individuals. However, parasite populations are sometimes so  
6 extremely subdivided that high levels of inbreeding may distort these relationships. Here, we  
7 used whole-genome sequence data from dove parasites (71 feather louse species of the genus  
8 *Columbicola*) and phylogenetic comparative methods to study the relationship between parasite  
9 effective population size and host population size and body size. We found that parasite effective  
10 population size is largely explained by host body size but not host population size. These results  
11 suggest the subdivided nature of parasite populations, rather than the overall number of  
12 parasites, has a stronger influence on the effective population size of parasites.  
13  
14

15 **Impact Summary**

16 Parasites, among Earth's most diverse, threatened, and under-protected animals, play a central  
17 role in ecosystem function. The effective population size ( $N_e$ ) of an organism has a profound  
18 impact on evolutionary processes, such as the relative contributions of selection and genetic drift  
19 to genomic change. Population size is also one of the most important parameters in conservation  
20 biology. For free-living organisms, it is expected that  $N_e$  is proportional to the total number of  
21 individuals in a population. However, for parasites, populations are sometimes so extremely  
22 subdivided that high levels of inbreeding may distort these relationships. In this study, we used  
23 whole-genome sequence data from dove parasites and phylogenetic comparative methods to  
24 investigate the relationship between parasite effective population size ( $N_e$ ) and host population  
25 size and body size. Our results revealed a positive relationship between parasite effective  
26 population size ( $N_e$ ) and host body size, but not host population size. These results suggest  
27 inbreeding may be a major factor in parasite infrapopulations, and have important implications for  
28 conservation.

29 **Main Text**

30

31 **Introduction**

32 The effective population size ( $N_e$ ) of an organism has a profound impact on evolutionary  
33 processes, such as the relative contributions of selection and genetic drift to genomic change  
34 (Wright, 1943; Waples, 2002; Charlesworth, 2009). For free-living organisms, it is expected that  
35  $N_e$  is proportional to the total number of individuals in a population (Frankham, 1995; Waples,  
36 2002). While population size estimates can often be readily obtained for free-living species,  
37 estimating the population size of parasites can be more challenging because this usually requires  
38 sampling from individual hosts (Criscione and Blouin 2005, Criscione et al., 2005; Poulin, 2007;  
39 Clayton et al., 2015; Strobel et al., 2019).

40 Typically, we might expect that the size of a parasite population is proportional to that of  
41 the host, because parasites rely on their hosts for survival and reproduction (Poulin, 2007; Barrett  
42 et al., 2008; Clayton et al., 2015). However, population subdivision can also influence measures  
43 of  $N_e$  for a species (Wright, 1943; Charlesworth et al., 2003). Theoretical expectations generally  
44 predict that subdivided populations have a higher overall  $N_e$  than non-subdivided ones  
45 (Charlesworth et al., 1997; Charlesworth et al., 2003; Charlesworth, 2009). On the other hand, in  
46 highly divided populations, levels of inbreeding can increase, such that the  $N_e$  of these subdivided  
47 populations is low (Charlesworth et al., 1997; Charlesworth et al., 2003; Charlesworth, 2009).

48 In the case of parasites, populations can sometimes be so extremely subdivided that  
49 each individual host harbors a distinct parasite population, termed infrapopulation (Bush et al.,  
50 1997; Huyse et al., 2005; Criscione and Blouin 2005, Criscione et al., 2005; Poulin, 2007; Clayton  
51 et al., 2015). This subdivision is particularly pronounced in the case of parasites that spend their  
52 entire lifecycle on the host (i.e., permanent parasites, DiBlasi et al., 2018; Sweet and Johnson,  
53 2018; Virrueta-Herrera et al., 2022). For example, lice, which are permanent parasitic insects of  
54 birds and mammals, have highly structured infrapopulations subject to high levels of inbreeding  
55 (Virrueta-Herrera et al., 2022). We might expect that infrapopulation size influences the effective  
56 population size of a parasite. This effective population size, in turn, could influence the amount of  
57 genetic variation within an infrapopulation, as has been shown for feather mites (Doña et al.,  
58 2015).

59 Host body size has been shown to strongly impact infrapopulation size, with larger-  
60 bodied hosts harboring larger parasite infrapopulations (Poulin, 1999; Poulin, 2007; Clayton et al.,  
61 2015). For example, a positive effect of host body size on parasite abundance has been shown  
62 for avian feather lice, which feed on the feathers of their hosts (Rozsa, 1997; Clayton and  
63 Walther, 2001). Thus, we would expect that feather lice on larger-bodied avian hosts would have  
64 higher  $N_e$ , reflecting their larger infrapopulation sizes. This relationship, in turn, should affect the  
65 degree of inbreeding and be evident in the genetic variation in lice of different infrapopulation  
66 sizes.

67 Thus, two factors may influence a parasite's  $N_e$ : 1) host population size and 2) host body  
68 size. We test the relative contributions of these two factors to parasite  $N_e$  by examining genome-  
69 wide variation in the wing lice (Phthiraptera: *Columbicola*) of pigeons and doves (Aves:  
70 Columbidae). Pigeons and doves vary dramatically in overall population sizes, with some  
71 species being among the most abundant birds on earth and others restricted to single small  
72 islands and highly endangered. In addition, pigeons and doves vary by over an order of  
73 magnitude in body mass, and smaller-bodied species have been shown to have smaller  
74 infrapopulations of these lice (Rozsa, 1997). Thus, pigeons and doves and their lice are an  
75 excellent system in which to examine the correlation between both host population size and host  
76 body size and parasite  $N_e$ . We used genome sequencing of 71 species of *Columbicola* to  
77 estimate a phylogeny for these parasites and examine the relationship between a genome-wide  
78 measure of effective population size ( $\theta$ ) and the overall population size and body size of their  
79 respective hosts, accounting for phylogeny.

80

81

## 82 **Materials and Methods**

83

### 84 **Taxon sampling and host data**

85 We sampled 89 individual lice, representing 71 different species of *Columbicola* (Table S1), which  
86 are feather lice (Insecta: Ischnocera) of pigeons and doves. We also included five feather louse  
87 outgroup taxa for the phylogenomic analyses, selected based on recent higher level  
88 phylogenomic studies of feather lice (Table S1). We obtained host body size (body mass)  
89 information from the Birds of the World online database (Billerman et al., 2022). Specifically, in  
90 cases where measures from both males and females were reported independently, we used the  
91 average between male and female body mass. We obtained global-scale host population size  
92 data from recent estimates (Callaghan et al., 2021). In particular, we used the “Abundance  
93 estimate” data from the “Dataset\_S01.xlsx” supplemental file.

94

### 95 **Genomic sequencing**

96 Some of the genomic data we analyzed here have been previously published (Boyd et al., 2017,  
97 see Table S1 for details). For the newly sequenced samples, which had been stored in 95%  
98 ethanol at -80 °C, we performed single-lice DNA extractions and photographed each specimen  
99 as a voucher. We extracted total genomic DNA by first letting the ethanol evaporate and then  
100 grinding the louse with a plastic pestle in a 1.5 ml tube. For DNA extraction, we used a Qiagen  
101 QIAamp DNA Micro Kit (Qiagen, Valencia, CA, USA) and conducted an initial incubation at 55 °C  
102 in buffer ATL with proteinase K for 48 h. Otherwise, we followed the manufacturer’s protocols and  
103 eluted purified DNA off the filter in a final volume of 50ul buffer AE. We used a Qubit 2.0  
104 Fluorometer (Invitrogen, Carlsbad, CA, USA) and the high sensitivity kit to quantify total DNA.

105

106 We prepared genomic libraries using the Hyper library construction kit (Kapa Biosystems). We  
107 then sequenced these libraries to generate 150 bp paired-end reads using Illumina NovaSeq  
108 6000 with S4 reagents. Libraries were tagged with unique dual-end adaptors and multiplexed 48  
109 libraries per lane, intending to achieve approximately 30-60X coverage of the nuclear genome.  
110 We trimmed adapters and demultiplexed the sequencing data using bcl2fastq v.2.20 to generate  
111 final fastq files. We deposited raw reads for each library in NCBI SRA (Table S1).

112

### 113 **Single-copy orthologs assembly, species delimitation, phylogenomic and cophylogenetic** 114 **analyses**

115 *Ortholog assembly:* We used fastp v0.20.1 (Chen et al., 2018) to perform adaptor and quality  
116 trimming (phred quality  $\geq 30$ ). We then converted trimmed fastq files to aTRAM 2.0 blast  
117 databases using the atram\_preprocessor.py command of aTRAM v2.3.4 (Allen et al., 2018). We  
118 used an amino acid sequence reference set of 2395 single-copy ortholog protein-coding genes  
119 (Johnson et al., 2018) from the human louse, *Pediculus humanus* (Kirkness et al., 2010). We  
120 assembled the single-copy ortholog genes using the atram.py command and the ABySS  
121 assembler with the following parameters (iterations = 3, max-target-seqs = 3000). The Exonerate  
122 pipeline in aTRAM (atram\_stitcher.py command) was used to stitch together exon sequences  
123 from these protein-coding genes (Slater and Birney, 2005).

124

125 *COI-based species delimitation analyses:* Several prior studies have indicated the potential for  
126 cryptic species within species of *Columbicola* (Johnson et al., 2007; Malenke et al., 2009; Sweet  
127 and Johnson, 2018), and we wanted to account for this in our comparative analyses. For  
128 assembly of the mitochondrial COI gene, we subsampled four million reads (two million read1  
129 and two million read2) from each library using Seqtk v1.3 (Li, 2022). As the reference target for  
130 constructing COI sequences from all samples in our current work, we used a COI sequence from  
131 *Columbicola columbae* that had previously been published (Johnson et al., 2007). For these  
132 assemblies, we ran aTRAM for only a single iteration. Then, we translated COI DNA sequences  
133 to amino acids, aligned them, and back-translated them to DNA sequences. As a quality control  
134 procedure, we blasted COI sequences against NCBI to identify any identical or nearly identical to  
135 previously generated Sanger sequences. We estimated a phylogenetic tree based on these COI  
136 sequences under maximum likelihood using model parameters estimated by IQ-TREE 2  
137 v.2.1.235 (Minh et al., 2020). We estimated ultrafast bootstrap support values with UFBoot2

138 (Hoang et al., 2017). Finally, we also computed the percent pairwise sequence divergences  
139 among all the COI sequences (using the R function `dist.dna`, model "raw," pairwise.deletion = T  
140 from APE v5.5, Paradis and Schliep, 2018) and looked at their distribution to identify likely cryptic  
141 species, which indicated a 5% uncorrected p-distance threshold would be appropriate, as in prior  
142 studies of lice (Johnson et al., 2021).

143  
144 ***Phylogenomic analyses:*** We translated assembled single-copy-ortholog nucleotide sequences to  
145 amino acids and aligned them using MAFFT v.7.47133 (Kato and Standley, 2013). After back-  
146 translation to nucleotide sequences, we used trimAL v.1.4.rev2234 (with a 40% gap threshold)  
147 (Capella-Gutiérrez et al., 2009) to trim individual gene alignments. We discarded any gene present  
148 in less than four taxa. We then concatenated gene alignments into a supermatrix and analyzed it  
149 under maximum likelihood using IQ-TREE 2 in a partitioned analysis that included model selection  
150 for each partition. Support was estimated using ultrafast bootstrapping (Hoang et al., 2017). We  
151 also ran a coalescent analysis using ASTRAL-III (Zhang et al., 2018) on individual gene trees  
152 estimated by maximum likelihood in IQ-TREE 2. As a measure of branch support, we computed  
153 local posterior probability for each branch in ASTRAL-III. Both trees were almost identical;  
154 therefore, we only used the partitioned concatenated tree for dating and phylogenetic comparative  
155 analyses.

156  
157 ***Cophylogenetic analyses:*** We used eMPress v1.0 (Santichaivekin et al., 2020) to compare host  
158 and parasite trees. As in prior cophylogenetic studies, we used costs of duplication: 1, sorting: 1,  
159 and host-switching: 2. This is the cost scheme used by most published cophylogenetic studies of  
160 lice, as well as other groups of ectosymbionts (Doña et al., 2017; Matthews et al., 2018; Sweet  
161 and Johnson, 2018; Johnson et al., 2021, 2022; Boyd et al., 2022). For the host tree, we obtained  
162 phylogenetic information from a prior phylogenomic study (Boyd et al., 2022). As there was no  
163 phylogenetic information for fourteen of the focal species in this tree, we obtained the placement  
164 of these species from additional phylogenetic studies (Johnson and Weckstein, 2011; Sweet et  
165 al., 2017; Nowak et al., 2019). We used the phylogeny derived from the partitioned analysis  
166 (above) for the parasite tree. Based on the distribution of the MPR distances histogram, we  
167 summarized the MPR space into one cluster and drew a representative median MPR. From this  
168 reconstruction we identified terminal cospeciation events between sister pairs of doves and lice to  
169 use in the molecular dating analysis (below).

170  
171 ***Dating analysis:*** We produced an ultrametric tree using the least square dating (LSD2) method  
172 implemented in IQ-TREE (To et al., 2016). Because there are no currently known fossilized lice  
173 within Ischnocera, we used terminal cospeciation events between sister pairs of doves and lice  
174 (above) as calibration points for molecular dating (Johnson et al., 2021, 2022). Specific  
175 cospeciation events that were used as calibration points can be found at Table S2 (see  
176 Supplemental information). For this analysis, we set a root age of 52 mya (based on de Moya et  
177 al., 2019) and a minimum branch length constraint ( $u = 0.01$ ) to avoid collapsing short but  
178 informative branches without introducing bias to the time estimates (see  
179 <https://github.com/tothuhien/lzd2>).

180

### 181 **SNP calling and mlRho analyses**

182 We used the *Columbicola columbae* chromosome-level genome assembly (Baldwin-Brown et al.,  
183 2021) as the reference for the SNP calling analyses. We aligned trimmed and filtered reads to the  
184 *C. columbae* reference genome using bwa v0.7.17 (Li and Durbin, 2009). We then removed PCR  
185 duplicates with picard v2.26.10 (Broad Institute, 2022) and sorted and indexed bam files with  
186 samtools v1.14 (Danecek et al., 2021). We called SNPs using bcftools multiallelic caller (Danecek  
187 and McCarthy, 2017). Lastly, we used vcftools to filter the vcf file with the following filtering  
188 parameters: <40% missing data, site Phred quality score >30, a minimum genotype depth of 10X,  
189 a maximum genotype depth of 60X, a minimum mean site depth of 10X and a maximum mean  
190 site depth of 60X. A total of 177,895 SNPs remained after filtering.

191

192 We used mlRho v2.9 (Haubold et al., 2010) to calculate the sample-specific mean theta ( $\theta$ ),  
193 which is defined as the population mutation rate, or  $\theta = 4N\mu$ , and which can be used as an



194 indicator of effective population size (Lynch, 2008; Meyer et al., 2012; Virrueta-Herrera et al.,  
195 2022) because it is directly proportional to  $N_e$ . For this analysis, we converted bam files from bwa  
196 to profile (.pro) files for each individual louse and then ran mlRho with maximum distance (M) = 0.

197

### 198 **Phylogenetic comparative methods**

199 We used phylogenetic generalized least squares (PGLS) models, gls function from nlme v3.1-149  
200 R package (Pinheiro et al., 2020), to examine associations between  $\theta$  (a measure of parasite  $N_e$ )  
201 and host population size and host body size. We evaluated various phylogenetic correlation  
202 structures in our weighted regressions (corPagel, corBrownian) and used AIC model comparisons  
203 to identify the best fitting correlation structure for the models. We checked models via visual  
204 inspection of diagnostic plots (residuals vs. fitted values and QQ plots to check normality).

205

### 206 **Results**

207 We found a strong positive relationship between  $\theta$ , a metric directly proportional to  $N_e$ , and host  
208 body size (PGLS, Brownian:  $R^2_{\text{pred}} = 0.44$ ,  $p < 0.001$ ; Pagel's  $\lambda$ :  $R^2_{\text{pred}} = 0.48$ ,  $p < 0.001$ ; Fig. 1).  
209 In contrast, there was no significant relationship between  $\theta$  and host population size (PGLS,  
210 Brownian & Pagel's  $\lambda$ :  $p > 0.05$ ). Including host population size in the best model led to a small  
211 improvement in the overall model fit (PGLS, Pagel's  $\lambda$  including host population size,  $R^2_{\text{pred}} =$   
212 0.52), but the host population size term remained non-significant (PGLS, Pagel's  $\lambda$  model  
213 including host population size,  $p > 0.05$ ).

214

### 215 **Discussion**

216 For parasites such as lice, hosts represent their habitat (Clayton et al., 2015). Host body size  
217 largely explains parasite infrapopulation size (Rozsa, 1997; Clayton and Walther, 2001).  
218 Genome scale data for parasitic lice of pigeons and doves revealed that metrics ( $\theta$ ), associated  
219 with effective population size ( $N_e$ ), are also highly correlated with host body size. In contrast,  
220 there was little association between parasite effective population size and host population size.  
221 Thus, it appears that the smaller infrapopulation sizes on smaller-bodied hosts increase the  
222 amount of inbreeding to such a degree that  $N_e$  is also reduced on smaller bodied hosts,  
223 eliminating any effects of overall parasite population size.

224

225 Several studies have indicated that louse infrapopulations on single host individuals are highly  
226 inbred, showing strong evidence of genetic structure even between host individuals in close  
227 proximity (Ascunce et al., 2013; DiBlasi et al., 2018; Virrueta-Herrera et al., 2022). This  
228 inbreeding would reduce the effective population size on single host individuals. However,  
229 theoretical models predict that population structure should increase overall effective population  
230 size (Charlesworth et al., 1997; Charlesworth et al., 2003; Charlesworth, 2009), at least to some  
231 extent, because alternative alleles can go to fixation in different infrapopulations increasing the  
232 overall standing genetic diversity of the global population. Counter to this expectation, we find  
233 that the estimator of  $N_e$  is lower for parasites on small-bodied doves that are expected to host  
234 smaller infrapopulations with higher levels of inbreeding.

235

236 One factor facilitating the effect of host body size on  $N_e$  may be the low migration rates of  
237 permanent parasites. A moderate migration rate among parasite infrapopulations is expected to  
238 increase  $N_e$ . However, permanent parasites, such as lice, have minimal dispersal capabilities and  
239 thus migration rates are expected to be very low. While host population size has been previously  
240 identified as a potential driver of parasite population dynamics (Doña and Johnson, 2020), the  
241 lack of relationship between parasite  $N_e$  and host population size might be indicative of these very  
242 low migration rates. In this case,  $N_e$  would be mainly influenced by the inbreeding of  
243 infrapopulations and not by the overall size of the total parasite population, because low migration  
244 prevents the overall population from approaching panmixis.

245

246 Selection is also known to influence effective population size (Charlesworth et al., 1997;  
247 Charlesworth et al., 2003; Charlesworth, 2009). For loci under selection, the realized effective  
248 population size is lower than those whose frequency is only affected by drift (Charlesworth et al.,  
249 1997; Charlesworth et al., 2003; Charlesworth, 2009). Louse species with smaller infrapopulation

250 sizes, and higher inbreeding, might suffer more from inbreeding depression. This would be a  
251 genome wide negative selection, which would be predicted to lower overall effective population  
252 size (Hedrick and García-Dorado, 2016). It is unknown if lice suffer from inbreeding depression,  
253 given that they normally experience high levels of inbreeding, but would be a topic of interest for  
254 future investigation.

255  
256 Another factor to consider is that smaller-bodied host species also typically have a lower parasite  
257 prevalence (*i.e.*, proportion of host individuals that are inhabited by the parasite) (Bush et al.,  
258 1997). This pattern might be due to smaller infrapopulations being more susceptible to local  
259 extinction because of environmental and demographic stochasticity, a known factor shaping  $N_e$   
260 (Charlesworth, 2009; Doña and Johnson, 2020). Therefore, host body size could influence local  
261 extinction probability of parasites and thus play a role in determining  $N_e$  of permanent parasites  
262 (Farrell et al., 2021). Given the lower prevalence and intensity of lice on small-bodied hosts, it  
263 may be that the total number of lice in the global population is actually smaller than those found  
264 on large-bodied hosts. While it might be expected that small-bodied doves have generally larger  
265 population sizes, because of the general inverse relationship between body size and population  
266 size of most organisms (White et al., 2007), we found no such relationship in our dataset ( $R^2 =$   
267  $0.003$ ,  $p > 0.1$ ). This finding agrees with previous results on other birds (Nee et al., 1991). Thus,  
268 while further research on global population estimates of louse species would help understand  
269 these relationships, our results suggest that at lower taxonomic levels, host body size and not  
270 host population size is the most explanatory factor of parasite  $N_e$ .

271  
272 Considerations of effective population size also have implications for conservation. Parasites are  
273 among the earth's most diverse, threatened, and under-protected animals (Carlson et al., 2017).  
274 Under the global parasite conservation plan, risk assessment, along with applying conservation  
275 genomics to parasites, were identified as two of the major goals for parasite conservation over  
276 the next decade (Carlson et al., 2020). Our result that host body size, but not host population  
277 size, is a good predictor of parasite  $N_e$  can easily translate into parasite conservation practices,  
278 drawing attention to conservation of smaller bodied hosts as a practice to conserve parasites.

279  
280 Overall, our study shows that host body size plays a major role in shaping parasite population  
281 genomics and provides evidence for the essential role that individual hosts play as habitat for  
282 permanent parasites with very limited transmission abilities.

### 283 **Acknowledgments**

284 We thank J.M. Bates, B. Benz, S.E. Bush, D.H. Clayton, T. Chesser, R. Faucett, R. Moyle, V.Q.  
285 Piacentini, F. Sheldon, A.D. Sweet, J.D. Weckstein, and B. Zonfrillo for assistance in obtaining  
286 specimens. We thank B.M. Boyd and S. Virrueta Herrera for assistance with gDNA extractions. A.  
287 Hernandez and C. Wright at the University of Illinois Roy J. Carver Biotechnology Center  
288 provided assistance with Illumina sequencing. We thank K.K.O. Walden for assistance with  
289 submitting reads to NCBI SRA. Funding was provided by US NSF DEB-1342604, DEB-1925487  
290 and DEB-1926919 grant awards to K.P.J., and European Commission grant H2020-MSCA-IF-  
291 2019 (INTROSYM:886532) to J.D.

### 292 **Author Contributions**

293  
294 J.D. designed the study, conducted the analyses, prepared figures, wrote the manuscript draft,  
295 and edited the manuscript. K.P.J. designed the study, obtained funding, wrote the manuscript  
296 draft, and edited the manuscript.

### 297 **Data accessibility**

298  
299 Intermediary files generated in this study have been deposited in Figshare (reserved DOI:  
300 10.6084/m9.figshare.21269640; private link for review:  
301 <https://figshare.com/s/2f2de5dc909155da815a>).

302  
303  
304



305

## References

- 306 Allen, J.M., LaFrance, R., Folk, R.A., Johnson, K.P. & Guralnick, R.P. (2018) aTRAM 2.0: An  
307 Improved, Flexible Locus Assembler for NGS Data. *Evolutionary Bioinformatics*, 14,  
308 1176934318774546.
- 309 Ascunce, M.S., Touns, M.A., Kassu, G., Fane, J., Scholl, K. & Reed, D.L. (2013) Nuclear Genetic  
310 Diversity in Human Lice (*Pediculus humanus*) Reveals Continental Differences and High  
311 Inbreeding among Worldwide Populations. *PLoS ONE*, 8, e57619.
- 312 Baldwin-Brown, J.G., Villa, S.M., Vickrey, A.I., Johnson, K.P., Bush, S.E., Clayton, D.H., et al.  
313 (2021) The assembled and annotated genome of the pigeon louse *Columbicola columbae*, a  
314 model ectoparasite. *G3 Genes|Genomes|Genetics*.
- 315 Barrett, L.G., Thrall, P.H., Burdon, J.J. & Linde, C.C. (2008) Life history determines genetic  
316 structure and evolutionary potential of host–parasite interactions. *Trends in Ecology & Evolution*,  
317 23, 678–685.
- 318 Billerman S. M., Keeney, B. K., Rodewald, P. G., and Schulenberg T. S. (2022) *Birds of the*  
319 *World*. Cornell Laboratory of Ornithology, Ithaca, NY, USA.
- 320 Boyd, B.M., Allen, J.M., Nguyen, N.-P., Sweet, A.D., Warnow, T., Shapiro, M.D., Villa, S.M.,  
321 Bush, S.E., Clayton, D.H. & Johnson, K.P. (2017) Phylogenomics using target-restricted  
322 assembly resolves intra-generic relationships of parasitic lice (Phthiraptera: *Columbicola*).  
323 *Systematic Biology*, 66, 896–911.
- 324 Boyd, B.M., Nguyen, N.-P., Allen, J.M., Waterhouse, R.M., Vo, K.B., Sweet, A.D., et al. (2022)  
325 Long-distance dispersal of pigeons and doves generated new ecological opportunities for host-  
326 switching and adaptive radiation by their parasites. *Proceedings of the Royal Society B*, 289,  
327 20220042.
- 328 Broadinstitute/picard: A set of command line tools (in Java) for manipulating high-throughput  
329 sequencing (HTS) data and formats such as SAM/BAM/CRAM and VCF. [WWW Document].  
330 (2022). URL <https://github.com/broadinstitute/picard>.
- 331 Bush, A.O., Lafferty, K.D., Lotz, J.M. & Shostak, A.W. (1997) Parasitology Meets Ecology on Its  
332 Own Terms: Margolis et al. Revisited. *The Journal of Parasitology*, Parasitology Meets Ecology  
333 on Its Own Terms: Margolis et al. Revisited, 83.
- 334 Callaghan, C.T., Nakagawa, S. & Cornwell, W.K. (2021) Global abundance estimates for 9,700  
335 bird species. *Proceedings of the National Academy of Sciences*, 118, e2023170118.
- 336 Capella-Gutiérrez, S., Silla-Martínez, J.M. & Gabaldón, T. (2009) trimAl: a tool for automated  
337 alignment trimming in large-scale phylogenetic analyses. *Bioinformatics*, 25, 1972–1973.
- 338 Carlson, C.J., Burgio, K.R., Dougherty, E.R., Phillips, A.J., Bueno, V.M., Clements, C.F., et al.  
339 (2017) Parasite biodiversity faces extinction and redistribution in a changing climate. *Science*  
340 *Advances*, 3, e1602422.
- 341 Carlson, C.J., Hopkins, S., Bell, K.C., Doña, J., Godfrey, S.S., Kwak, M.L., et al. (2020) A global  
342 parasite conservation plan. *Biological Conservation*, 250, 108596.
- 343 Charlesworth, B., Nordborg, M. & Charlesworth, D. (1997) The effects of local selection, balanced  
344 polymorphism and background selection on equilibrium patterns of genetic diversity in subdivided  
345 populations. *Genetics Research*, 70, 155–174.
- 346 Charlesworth, B., Charlesworth, D. & Barton, N.H. (2003) The effects of genetic and geographic  
347 structure on neutral variation. *Annual Review of Ecology, Evolution, and Systematics*, 34, 99–  
348 125.
- 349 Charlesworth, B. (2009) Effective population size and patterns of molecular evolution and  
350 variation. *Nature Reviews Genetics*, 10, 195–205.
- 351 Chen, S., Zhou, Y., Chen, Y. & Gu, J. (2018) fastp: an ultra-fast all-in-one FASTQ preprocessor.  
352 *Bioinformatics*, 34, i884–i890.
- 353 Clayton, D.H. & Walther, B.A. (2001) Influence of host ecology and morphology on the diversity of  
354 Neotropical bird lice. *Oikos*, 94, 455–467.
- 355 Clayton, D.H., Bush, S. & Johnson, K.P. (2015) *Coevolution of Life on Hosts: Integrating Ecology*  
356 *and History*, Clayton, Bush, Johnson. University of Chicago Press.
- 357 Criscione, C.D. & Blouin, M.S. (2005) Effective sizes of macroparasite populations: a conceptual  
358 model. *Trends in Parasitology*, 21, 212–217.
- 359 Criscione, C.D., Poulin, R. & Blouin, M.S. (2005) Molecular ecology of parasites: elucidating  
360 ecological and microevolutionary processes. *Molecular Ecology*, 14, 2247–2257.

- 361 Danecek, P. & McCarthy, S.A. (2017) BCFtools/csq: haplotype-aware variant consequences.  
362 *Bioinformatics*, 33, btx100.
- 363 Danecek, P., Bonfield, J.K., Liddle, J., Marshall, J., Ohan, V., Pollard, M.O., et al. (2021) Twelve  
364 years of SAMtools and BCFtools. *GigaScience*, 10, giab008.
- 365 DiBlasi, E., Johnson, K.P., Stringham, S.A., Hansen, A.N., Beach, A.B., Clayton, D.H., et al.  
366 (2018) Phoretic dispersal influences parasite population genetic structure. *Molecular Ecology*, 27,  
367 2770–2779.
- 368 Doña, J., Sweet, A.D., Johnson, K.P., Serrano, D., Mironov, S. & Jovani, R. (2017)  
369 Cophylogenetic analyses reveal extensive host-shift speciation in a highly specialized and host-  
370 specific symbiont system. *Molecular Phylogenetics and Evolution*, 115, 190–196.
- 371 Doña, J., Moreno-García, M., Criscione, C.D., Serrano, D. & Jovani, R. (2015) Species mtDNA  
372 genetic diversity explained by infrapopulation size in a host-symbiont system. *Ecology and*  
373 *Evolution*, 5, 5801–5809.
- 374 Doña, J. & Johnson, K.P. (2020) Assessing symbiont extinction risk using cophylogenetic data.  
375 *Biological Conservation*, 250, 108705.
- 376 Farrell, M.J., Park, A.W., Cressler, C.E., Dallas, T., Huang, S., Mideo, N., et al. (2021) The ghost of  
377 hosts past: impacts of host extinction on parasite specificity. *Philosophical Transactions of the*  
378 *Royal Society B*, 376, 20200351.
- 379 Frankham, R. (1995) Effective population size/adult population size ratios in wildlife: a review.  
380 *Genetical Research*, 66, 95–107.
- 381 H. Li (2022) seqtk Toolkit for processing sequences in FASTA/Q formats. URL [https://github.com/](https://github.com/lh3/seqtk)  
382 [lh3/seqtk](https://github.com/lh3/seqtk)
- 383 Haubold, B., Pfaffelhuber, P. & Lynch, M. (2010) mlRho – a program for estimating the population  
384 mutation and recombination rates from shotgun-sequenced diploid genomes. *Molecular Ecology*,  
385 19, 277–284.B.
- 386 Hedrick, P.W. & Garcia-Dorado, A. (2016) Understanding Inbreeding Depression, Purging, and  
387 Genetic Rescue. *Trends in Ecology & Evolution*, 31, 940–952.
- 388 Herrera, S.V., Johnson, K.P., Sweet, A.D., Ylinen, E., Kunnasranta, M. & Nyman, T. (2022) High  
389 levels of inbreeding with spatial and host-associated structure in lice of an endangered freshwater  
390 seal. *Molecular Ecology*, 31, 4593–4606.
- 391 Hoang, D.T., Chernomor, O., Haeseler, A. von, Minh, B.Q. & Vinh, L.S. (2017) UFBoot2:  
392 Improving the Ultrafast Bootstrap Approximation. *Molecular Biology and Evolution*, 35, 518–522.
- 393 Huyse, T., Poulin, R. & Théron, A. (2005) Speciation in parasites: a population genetics  
394 approach. *Trends in Parasitology*, 21, 469–475.
- 395 Johnson, K.P., Reed, D.L., Parker, S.L.H., Kim, D. & Clayton, D.H. (2007) Phylogenetic analysis  
396 of nuclear and mitochondrial genes supports species groups for *Columbicola* (Insecta:  
397 Phthiraptera). *Molecular Phylogenetics and Evolution*, 45, 506–518.
- 398 Johnson, K.P. & Weckstein, J.D. (2011) The Central American land bridge as an engine of  
399 diversification in New World doves. *Journal of Biogeography*, 38, 1069–1076.
- 400 Johnson, K.P., Dietrich, C.H., Friedrich, F., Beutel, R.G., Wipfler, B., Peters, R.S., et al. (2018)  
401 Phylogenomics and the evolution of hemipteroid insects. *Proceedings of the National Academy of*  
402 *Sciences*, 115, 201815820.
- 403 Johnson, K.P., Weckstein, J.D., Herrera, S.V. & Doña, J. (2021) The interplay between host  
404 biogeography and phylogeny in structuring diversification of the feather louse genus *Penenirmus*.  
405 *Molecular Phylogenetics and Evolution*, 107297.
- 406 Johnson, K.P., Matthee, C. & Doña, J. (2022) Phylogenomics reveals the origin of mammal lice  
407 out of Afrotheria. *Nature Ecology & Evolution*, 6, 1205–1210.
- 408 Katoh, K. & Standley, D.M. (2013) MAFFT Multiple Sequence Alignment Software Version 7:  
409 Improvements in Performance and Usability. *Molecular Biology and Evolution*, 30, 772–780.
- 410 Kirkness, E.F., Haas, B.J., Sun, W., Braig, H.R., Perotti, M.A., Clark, J.M., et al. (2010) Genome  
411 sequences of the human body louse and its primary endosymbiont provide insights into the  
412 permanent parasitic lifestyle. *Proceedings of the National Academy of Sciences*, 107, 12168–  
413 12173.
- 414 Li, H. & Durbin, R. (2009) Fast and accurate short read alignment with Burrows–Wheeler  
415 transform. *Bioinformatics*, 25, 1754–1760.

- 416 Lynch, M. (2008) Estimation of Nucleotide Diversity, Disequilibrium Coefficients, and Mutation  
417 Rates from High-Coverage Genome-Sequencing Projects. *Molecular Biology and Evolution*, 25,  
418 2409–2419.
- 419 Malenke, J.R., Johnson, K.P. & Clayton, D.H. (2009) Host Specialization Differentiates Cryptic  
420 Species of Feather-Feeding Lice. *Evolution*, 63, 1427–1438.
- 421 Matthews, A.E., Klimov, P.B., Proctor, H.C., Dowling, A.P.G., Diener, L., Hager, S.B., et al. (2018)  
422 Cophylogenetic assessment of New World warblers (Parulidae) and their symbiotic feather mites  
423 (Proctophylloidae). *Journal of Avian Biology*, 49, jav-01580.
- 424 Meyer, M., Kircher, M., Gansauge, M.-T., Li, H., Racimo, F., Mallick, S., et al. (2012) A High-  
425 Coverage Genome Sequence from an Archaic Denisovan Individual. *Science*, 338, 222–226.
- 426 Minh, B.Q., Schmidt, H.A., Chernomor, O., Schrempf, D., Woodhams, M.D., Haeseler, A. von, et  
427 al. (2020) IQ-TREE 2: New models and efficient methods for phylogenetic inference in the  
428 genomic era. *Molecular Biology and Evolution*, 37, 1530–1534.
- 429 Moya, R.S. de, Allen, J.M., Sweet, A.D., Walden, K.K.O., Palma, R.L., Smith, V.S., et al. (2019)  
430 Extensive host-switching of avian feather lice following the Cretaceous-Paleogene mass  
431 extinction event. *Communications Biology*, 2, 445.
- 432 Nee, S., Read, A.F., Greenwood, J.J.D. & Harvey, P.H. (1991) The relationship between  
433 abundance and body size in British birds. *Nature*, 351, 312–313.
- 434 Nieminen, M., Rita, H. & Uuvana, P. (1999) Body size and migration rate in moths. *Ecography*,  
435 22, 697–707.
- 436 Nowak, J., Sweet, A., Weckstein, J. & Johnson, K. (2019) A molecular phylogenetic analysis of  
437 the genera of fruit doves and allies using dense taxonomic sampling. *Illinois Natural History  
438 Survey Bulletin*, 42, 2019001.
- 439 Paradis, E. & Schliep, K. (2018) ape 5.0: an environment for modern phylogenetics and  
440 evolutionary analyses in R. *Bioinformatics*, 35, 526–528.
- 441 Pinheiro, J., Bates, D., DebRoy, S., Sarkar, D. & Team, R.C. (2020) nlme: Linear and Nonlinear  
442 Mixed Effects Models.
- 443 Poulin, R. (1999) Body size vs abundance among parasite species: positive relationships?  
444 *Ecography*, 22, 246–250.
- 445 Poulin, R. (2007) *Evolutionary Ecology of Parasites*. Princeton University Press, Princeton, New  
446 Jersey.
- 447 Rozsa, L. (1997) Patterns in the Abundance of Avian Lice (Phthiraptera: Amblycera, Ischnocera).  
448 *Journal of Avian Biology*, 28, 249.
- 449 Santichaivekin, S., Yang, Q., Liu, J., Mawhorter, R., Jiang, J., Wesley, T., et al. (2020) eMPress:  
450 a systematic cophylogeny reconciliation tool. *Bioinformatics*.
- 451 Slater, G.S.C. & Birney, E. (2005) Automated generation of heuristics for biological sequence  
452 comparison. *BMC Bioinformatics*, 6, 31–31.
- 453 Strobel, H.M., Hays, S.J., Moody, K.N., Blum, M.J. & Heins, D.C. (2019) Estimating effective  
454 population size for a cestode parasite infecting three-spined sticklebacks. *Parasitology*, 146, 883–  
455 896.
- 456 Sweet, A.D., Maddox, J.D. & Johnson, K.P. (2017) A complete molecular phylogeny of *Claravis*  
457 confirms its paraphyly within small New World ground-doves (Aves: Peristerinae) and implies  
458 multiple plumage state transitions. *Journal of Avian Biology*, 48, 459–464.
- 459 Sweet, A.D. & Johnson, K.P. (2018) The role of parasite dispersal in shaping a host–parasite  
460 system at multiple evolutionary scales. *Molecular Ecology*, 27, 5104–5119.
- 461 To, T.-H., Jung, M., Lycett, S. & Gascuel, O. (2016) Fast Dating Using Least-Squares Criteria and  
462 Algorithms. *Systematic Biology*, 65, 82–97.
- 463 Waples, R.S. (2002) Definition and estimation of effective population size in the conservation of  
464 endangered species. In *Population Viability Analysis* (ed. by Beissinger, S.R. & McCullough,  
465 D.R.). University of Chicago Press, Chicago.
- 466 White, E.P., Ernest, S.K.M., Kerkhoff, A.J. & Enquist, B.J. (2007) Relationships between body  
467 size and abundance in ecology. *Trends in Ecology & Evolution*, 22, 323–330.
- 468 Wright, S. (1943) Isolation by distance. *Genetics*, 28, 114–138.
- 469 Zhang, C., Rabiee, M., Sayyari, E. & Mirarab, S. (2018) ASTRAL-III: polynomial time species tree  
470 reconstruction from partially resolved gene trees. *BMC Bioinformatics*, 19, 15

471 **Figures**

472

473 **Figure 1.** Relationship between a genome-wide measure ( $\theta$ ) of effective population size and host  
474 body size. The black regression line corresponds to the PGLS model and the gray regression  
475 line to the same GLS model without accounting for phylogenetic non-independence. Credit: louse  
476 photos on the left: Stephany Virrueta-Herrera; bird illustrations on the bottom, ©Lynx Edicions  
477 (*Otidiphaps nobilis*: Hilary Burn; *Geopelia cuneata*: Martin Elliott).

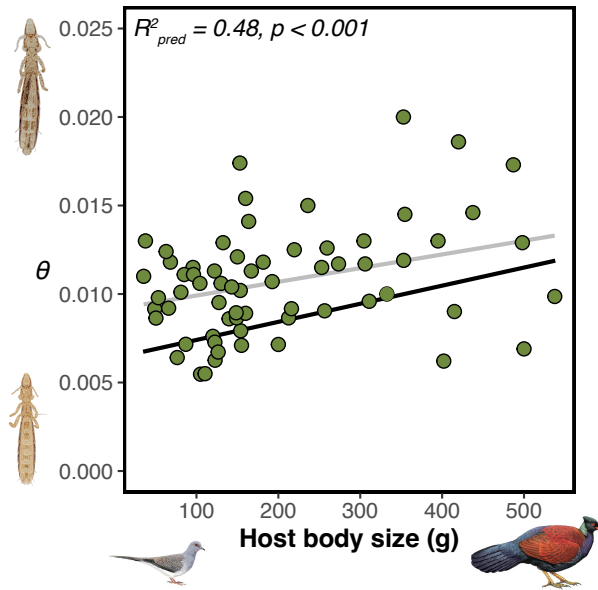

478
